# Supplementary material
Source: PubMed Central journal article supplement (PMC7118240)

## Validation of the COPD Assessment Test (CAT) as an Outcome Measure in Bronchiectasis

*Simon Finch, MBChB; Irena F. Laska, MBBS; Hani Abo-Leyah, MBChB; Thomas C. Fardon, MD; and James D. Chalmers, MBChB, PhD*

CHEST 2020; 157(4):815-823

*Online supplements are not copyedited prior to posting and the author(s) take full responsibility for the accuracy of all data.*

© 2019 AMERICAN COLLEGE OF CHEST PHYSICIANS. Reproduction of this article is prohibited without written permission from the American College of Chest Physicians. See online for more details. DOI: 10.1016/j.chest.2019.10.030

**e-Table 1. Characteristics of the patients in the TRIBE cohort**

| <b>Variable</b>                       | <b>N (%) or median (IQR)</b> |
|---------------------------------------|------------------------------|
| N                                     | 48                           |
| Age (years)                           | 68 (63-72)                   |
| Sex (% female)                        | 31 (64.6%)                   |
| FEV <sub>1</sub> L                    | 1.80 (1.19-2.11)             |
| FEV <sub>1</sub> % predicted          | 81.5 (53.3-102.0)            |
| FVC L                                 | 2.76 (2.25-3.74)             |
| 6 minute walk distance (m)            | 432.5 (333.8-496.8)          |
| Exacerbations per year                | 3 (1-4)                      |
| <b>Smoking status</b>                 |                              |
| Never                                 | 31 (64.6%)                   |
| History of smoking                    | 17 (35.4%)                   |
| <b>BSI</b>                            |                              |
| Mild                                  | 9 (18.7%)                    |
| Moderate                              | 27 (56.3%)                   |
| Severe                                | 12 (25.0%)                   |
| <b>Chronic infection status</b>       |                              |
| <i>Haemophilus influenzae</i>         | 18 (37.5%)                   |
| <i>Pseudomonas aeruginosa</i>         | 6 (12.5%)                    |
| <i>Moraxella catarrhalis</i>          | 3 (6.3%)                     |
| <i>Staphylococcus aureus</i>          | 2 (4.2%)                     |
| <i>Enterobacteriaceae</i>             | 4 (8.3%)                     |
| No organism isolated at baseline      | 15 (31.3%)                   |
| <b>Quality of life/symptom scores</b> |                              |
| CAT score                             | 21 (12-25)                   |
| SGRQ score                            | 42.5 (27.6-56.9)             |

**e-Table 2. Baseline characteristics of the validation cohort.**

| <b>Variable</b>                   | <b>N (%) or median (IQR)</b> |
|-----------------------------------|------------------------------|
| N                                 | 83                           |
| Age (years)                       | 71 (67-78)                   |
| Sex (% female)                    | 45 (54.2%)                   |
| FEV <sub>1</sub> L                | 1.26 (0.89-1.67)             |
| FEV <sub>1</sub> % predicted      | 52 (43-62%)                  |
| FVC L                             | 2.56 (1.96-3.19)             |
| Sputum volume (ml/day)            | 20 (5-50)                    |
| Exacerbations per year            | 2 (0-3)                      |
| Hospitalised in the previous year | 22 (26.5%)                   |
| <b>Smoking status</b>             |                              |
| Never smoker                      | 61 (73.5%)                   |
| History of smoking                | 22 (26.5%)                   |
| <b>BSI</b>                        |                              |
| Mild                              | 12 (14.5%)                   |
| Moderate                          | 24 (28.9%)                   |
| Severe                            | 47 (56.6%)                   |
| <b>Chronic infection status</b>   |                              |
| <i>Haemophilus influenzae</i>     | 28 (33.7%)                   |
| <i>Pseudomonas aeruginosa</i>     | 15 (18.1%)                   |
| <i>Moraxella catarrhalis</i>      | 7 (8.4%)                     |
| <i>Staphylococcus aureus</i>      | 6 (7.2%)                     |
| <i>Enterobacteriaceae</i>         | 10 (12.0%)                   |
| No organism isolated at baseline  | 17 (20.5%)                   |
| <b>Quality of life scores</b>     |                              |
| QOL-B score                       | 54 (40.7-66.6)               |
| CAT score                         | 22 (17-27)                   |

**e-Figure 1. Comparison of CAT score with SGRQ component scores.**

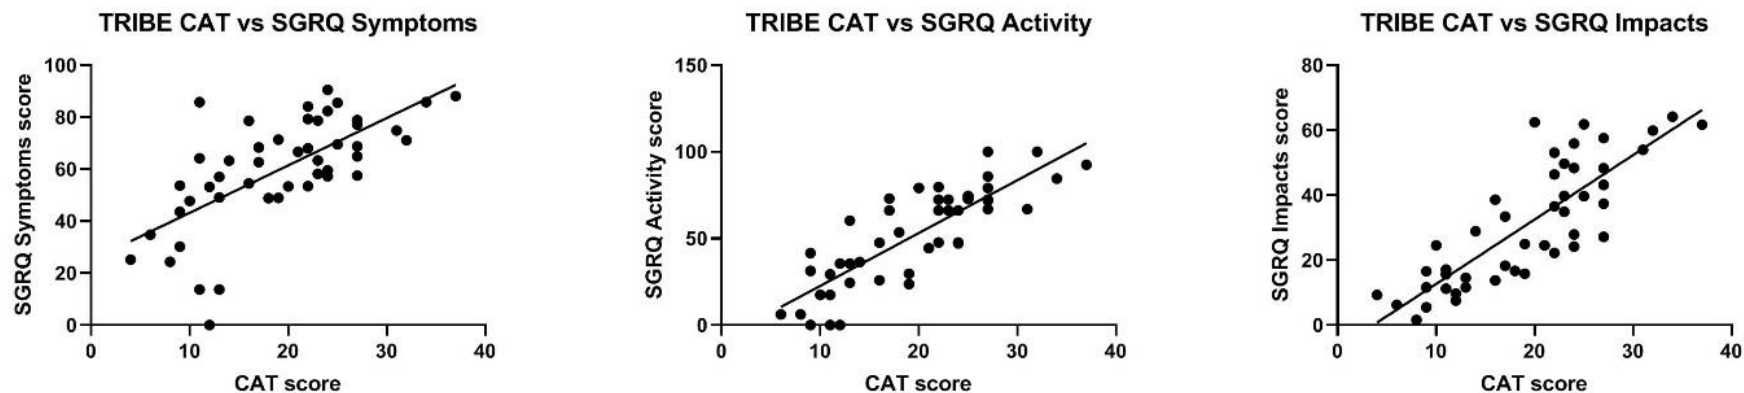

**e-Figure 2. Linear regression of the CAT score with LCQ domains (physical, psychological and social). P<0.0001 for all relationships.**

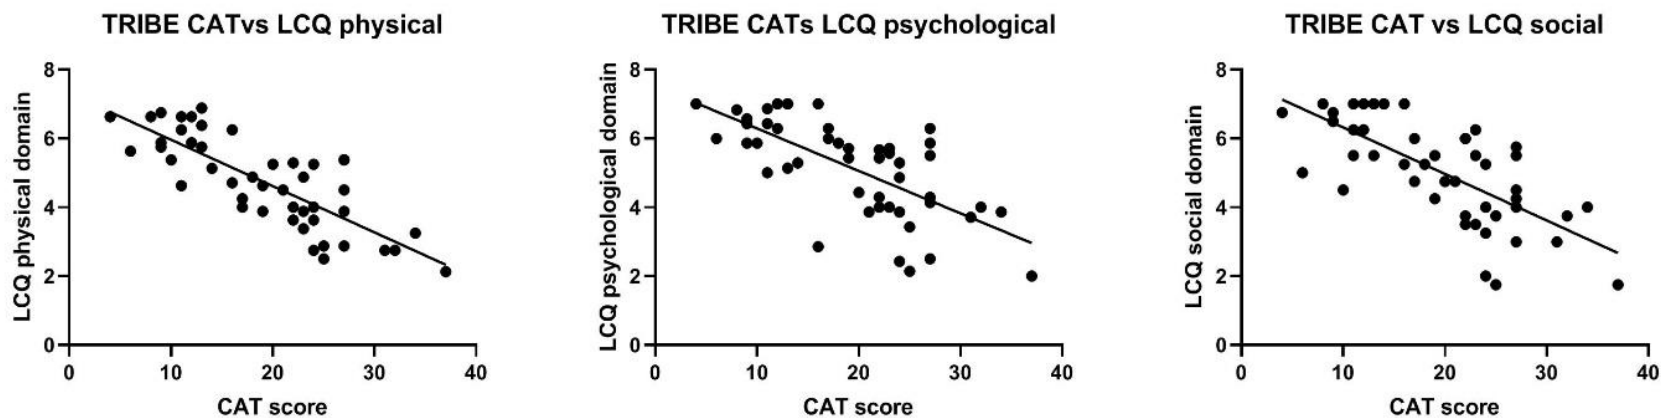

**e-Figure 3. Bland Altman plot examining two CAT measurements four weeks apart while clinically stable.**

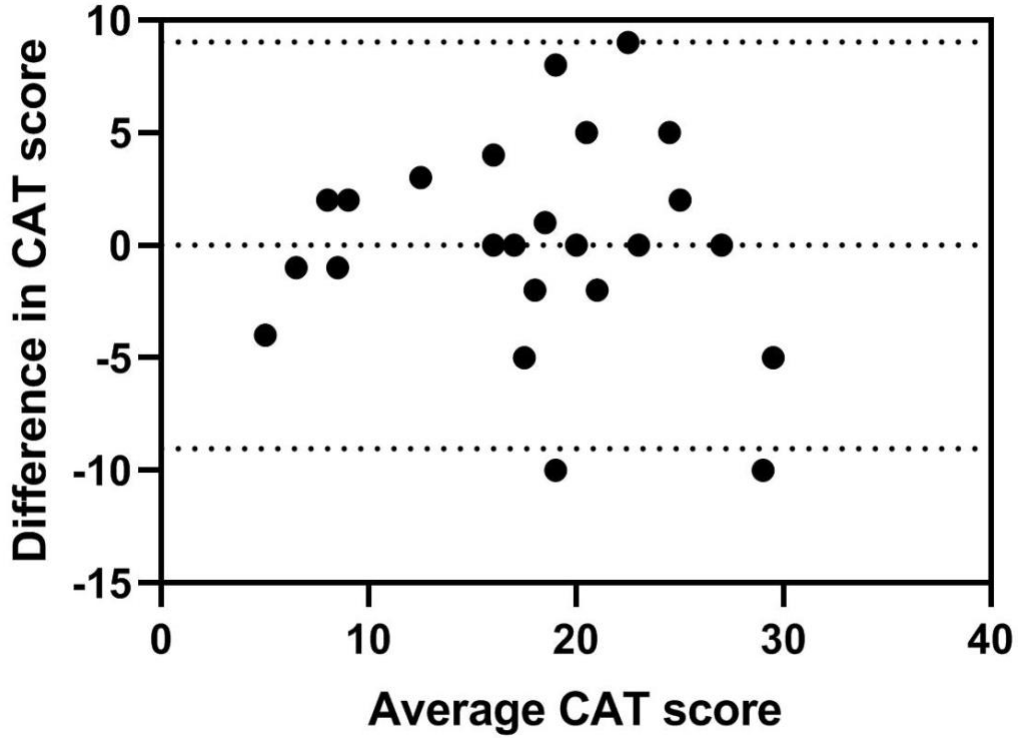

Supplement: mmc1.pdf [file mmc1.pdf]
